# Supplementary material
Source: PubMed Central journal article supplement (PMC3263968)
Supplement: supp_111.185116_JPET185116_Supplemental_Data.pdf [file supp_111.185116_JPET185116_Supplemental_Data.pdf]

## Supplemental Data

Article Title: Characterization of two mutations, M287L and Q266I, in the  $\alpha 1$  glycine receptor subunit that modify sensitivity to alcohols

Authors: Cecilia M. Borghese, Yuri A. Blednov, Yu Quan, Sangeetha V. Iyer, Wei Xiong, S. John Mihic, Li Zhang, David M. Lovinger, James R. Trudell, Gregg E. Homanics, R. Adron Harris

Journal name: The Journal of Pharmacology and Experimental Therapeutics

Table A. Parameters of glycine concentration-response curves in *Xenopus* oocytes.  $EC_{50}$ , effective concentration 50,  $n_H$ , Hill coefficient and n, number of oocytes per group. Data is presented as mean (95% confidence intervals) or mean  $\pm$  S.E.M. \* $p < 0.05$  versus corresponding WT. The two  $\alpha 1$  wild-type (WT) curves were determined on different occasions (same batches as the corresponding mutants), and they are not significantly different.

|                      | $\alpha 1$ WT (n= 6) | $\alpha 1$ (M287L) (n= 5) |
|----------------------|----------------------|---------------------------|
| $EC_{50}$ ( $\mu$ M) | 201 (167 to 244)     | 664 (568 to 776)*         |
| $n_H$                | 1.6 $\pm$ 0.2        | 1.4 $\pm$ 0.1             |
|                      | $\alpha 1$ WT (n= 7) | $\alpha 1$ (Q266I) (n= 8) |
| $EC_{50}$ ( $\mu$ M) | 136 (107 to 172)     | 227 (207 to 248)*         |
| $n_H$                | 2.0 $\pm$ 0.4        | 2.2 $\pm$ 0.2             |

Table B. Drug effects on GlyR expressed in *Xenopus* oocytes. Glycine (EC<sub>5</sub>) was co-applied with the drug; no pre-application was used, except pentylenetetrazole (1-min pre-application). The concentrations for ketamine, pentobarbital and flurazepam were chosen based on the levels present in brain, capable of inducing loss of righting reflex (Cohen et al., 1973; Miller et al., 1988; Franks and Lieb, 1994). The concentration for pentylenetetrazol was approximately the level that induces seizures (Yonekawa et al., 1980). Data shown is the change in the control (EC<sub>5</sub>) glycine response, expressed as a percentage of the control glycine response. Data is presented as mean  $\pm$  S.E.M. (number of oocytes tested). Statistical analysis: One-Way ANOVA, Dunnett's Multiple Comparison Test for post-hoc analysis; \*  $p < 0.05$  versus WT.

|                                | <b><math>\alpha 1</math> WT</b> | <b><math>\alpha 1</math>(M287L)</b> | <b><math>\alpha 1</math>(Q266I)</b> |
|--------------------------------|---------------------------------|-------------------------------------|-------------------------------------|
| Ketamine (365 $\mu$ M)         | -20 $\pm$ 3 (5)                 | -17 $\pm$ 6 (5)                     | -27 $\pm$ 3 (4)                     |
| Pentobarbital (50 $\mu$ M)     | 11 $\pm$ 1 (4)                  | 52 $\pm$ 6* (4)                     | -8 $\pm$ 5* (4)                     |
| Flurazepam (25 $\mu$ M)        | -1 $\pm$ 3 (4)                  | -3 $\pm$ 1 (4)                      | -7 $\pm$ 3 (4)                      |
| Pentylenetetrazole (6 $\mu$ M) | 25 $\pm$ 10 (4)                 | 5 $\pm$ 3 (4)                       | 14 $\pm$ 3 (4)                      |
| GABA (1 mM)                    | -9 $\pm$ 4 (4)                  | -23 $\pm$ 1* (4)                    | -11 $\pm$ 2 (4)                     |
| Glutamate (1 mM)               | -9 $\pm$ 4 (4)                  | -10 $\pm$ 2 (4)                     | -11 $\pm$ 6 (4)                     |

Table C. Parameters from binding experiments in homogenates of brain stem and spinal cord from WT ( $\alpha 1^{M/M}$  and  $\alpha 1^{Q/Q}$ ) and heterozygous knockin ( $\alpha 1^{M/L}$  and  $\alpha 1^{Q/l}$ ) mice.  $B_{MAX}$  (fmol/mg protein) is the maximal number of binding sites,  $K_D$  (nM) is the affinity constant,  $n_H$  is the Hill coefficient and  $IC_{50}$  ( $\mu M$ ) is the inhibitory concentration 50. Data was analyzed using t-test: #  $p=0.08$ , \*  $p<0.05$ , \*\*  $p<0.01$ , \*\*\*  $p<0.0001$  versus corresponding WT. N.D., not determined.

|                                              | $\alpha 1^{M/M}$ | $\alpha 1^{M/L}$    | $\alpha 1^{Q/Q}$ | $\alpha 1^{Q/l}$ |
|----------------------------------------------|------------------|---------------------|------------------|------------------|
| <b>[<sup>3</sup>H]-Strychnine binding</b>    |                  |                     |                  |                  |
| Saturation binding experiments               |                  |                     |                  |                  |
| $B_{MAX}$                                    | 1408 ± 45 (4)    | 1425 ± 96 (4)       | 1338 ± 72 (7)    | 1530 ± 120 (7)   |
| $K_D$                                        | 4.31 ± 0.57 (4)  | 4.62 ± 0.38 (4)     | 3.9 ± 0.5 (7)    | 4.2 ± 1.1 (7)    |
| $n_H$                                        | 1.10 ± 0.07 (4)  | 1.05 ± 0.06 (4)     | 1.11 ± 0.11 (7)  | 1.17 ± 0.11 (7)  |
| Glycine competitive binding experiments      |                  |                     |                  |                  |
| $IC_{50}$                                    | 23.7 ± 2.2 (3)   | 37.5 ± 1.7 ** (3)   | 20.4 ± 2.5 (4)   | 36.2 ± 4.4 * (4) |
| $n_H$                                        | -1.11 ± 0.07 (3) | -1.42 ± 0.16 (3)    | -1.12 ± 0.06 (4) | -1.11 ± 0.04 (4) |
| Taurine competitive binding experiments      |                  |                     |                  |                  |
| $IC_{50}$                                    | 100.5 ± 1.6 (3)  | 178.3 ± 3.6 *** (3) | 149 ± 25 (4)     | 231 ± 31# (4)    |
| $n_H$                                        | -1.37 ± 0.08 (3) | -1.60 ± 0.11 (3)    | -1.64 ± 0.17 (4) | -1.37 ± 0.06 (4) |
| <b>[<sup>3</sup>H]-Flunitrazepam binding</b> |                  |                     |                  |                  |
| Homologous competitive binding experiments   |                  |                     |                  |                  |
| $B_{MAX}$                                    | N.D.             | N.D.                | 1346 ± 37 (3)    | 1543 ± 123 (3)   |
| $K_D$                                        | N.D.             | N.D.                | 2.48 ± 0.06 (3)  | 2.70 ± 0.24 (3)  |

## REFERENCES

- Cohen ML, Chan SL, Way WL and Trevor AJ (1973) Distribution in the brain and metabolism of ketamine in the rat after intravenous administration. *Anesthesiology* **39**:370-376.
- Franks NP and Lieb WR (1994) Molecular and cellular mechanisms of general anaesthesia. *Nature* **367**:607-614.
- Miller LG, Greenblatt DJ, Abernethy DR, Friedman H, Luu MD, Paul SM and Shader RI (1988) Kinetics, brain uptake, and receptor binding characteristics of flurazepam and its metabolites. *Psychopharmacology (Berl)* **94**:386-391.
- Yonekawa WD, Kupferberg HJ and Woodbury DM (1980) Relationship between pentylenetetrazol-induced seizures and brain pentylenetetrazol levels in mice. *J Pharmacol Exp Ther* **214**:589-593.
